# Supplementary material
Source: ML conference proceedings conference paper supplement (https://proceedings.mlr.press/v80/tao18a.html)
Supplement: Supplementary file [file tao18a-supp.pdf]

## A. Proof of Lemma 10

Notice that when  $n \geq c_0 \ell \ln(5/\delta)$  where  $\ell \geq d$ , we have

$$\begin{aligned}
 \text{err}_{\lambda^*}(x, c_0 \ell) &\leq \sqrt{\frac{4L^2 \|x\|_{M(\lambda^*)}^2}{c_0 \ell} + \frac{\frac{8}{9} L^2 (\|x\|_2^2 + 2\|x\|_2 \|x\|_{M(\lambda^*)} \sqrt{d} + \|x\|_{M(\lambda^*)}^2 d)}{c_0^2 \ell^2}} \\
 &\quad + \sqrt{2\kappa} \sqrt{\frac{\|x\|_{M(\lambda^*)}^2}{c_0 \ell} \sqrt{\frac{3d}{c_0 \ell}} + \frac{\|x\|_{M(\lambda^*)}^2}{c_0 \ell}} \\
 &\leq \sqrt{\frac{\|x\|_{M(\lambda^*)}^2 + \|x\|_2^2 + \|x\|_2 \|x\|_{M(\lambda^*)} \sqrt{d}}{\ell} + \frac{\|x\|_{M(\lambda^*)}^2 d}{3\ell^2}} + \sqrt{\frac{2\|x\|_{M(\lambda^*)}^2 \sqrt{d/\ell}}{3\ell} + \frac{\|x\|_{M(\lambda^*)}^2}{\ell}} \\
 &\leq \sqrt{\frac{2\|x\|_2^2 + 2\sqrt{d}\|x\|_2 \|x\|_{M(\lambda^*)} + (4 + 2\sqrt{d/\ell})\|x\|_{M(\lambda^*)}^2}{\ell}},
 \end{aligned}$$

and so the result follows from Lemma 7.

## B. Proof of Theorem 12

Let  $\ell = \frac{2+6d+\epsilon d}{\epsilon^2}$ . Lemma 11 implies that with probability at least  $1 - \delta$ , for every  $x \in \mathcal{X}$ ,

$$\begin{aligned}
 |x^\top \theta - x^\top \hat{\theta}| &\leq \sqrt{\frac{2 + 6d + 2d\sqrt{d/\ell}}{\ell}} \\
 &= \sqrt{\frac{2 + 6d}{2 + 6d + \epsilon d} \epsilon^2 + \frac{2d^{\frac{3}{2}}}{(2 + 6d + \epsilon d)^{\frac{3}{2}}} \epsilon^3} \\
 &= \epsilon \sqrt{1 - \frac{\epsilon d}{2 + 6d + \epsilon d}} + \sqrt{\frac{4d}{2 + 6d + \epsilon d}} \cdot \frac{\epsilon d}{2 + 6d + \epsilon d} \\
 &\leq \epsilon.
 \end{aligned}$$

## C. Proof of Theorem 15

Let  $A^{-1} = \sum_{i=1}^d \lambda_i v_i v_i^\top$  be its eigen-decomposition (so that  $v_i$ 's form an orthonormal basis). Note that  $\|v_i\| = 1$ . By Lemma 10, for each  $v_i$ , with probability at least  $(1 - \delta/d)$ , we have

$$|v_i^\top (\theta - \hat{\theta})| \leq \sqrt{\frac{2 + (4 + 2\sqrt{d/\ell})\|x\|_{M(\lambda^*)}^2 + 2\sqrt{d}\|x\|_{M(\lambda^*)}}{\ell}}.$$

Let  $\lambda'_i = \|v_i\|_{M(\lambda^*)}^2 = n\lambda_i$  for every  $i \in \{1, 2, 3, \dots, d\}$ . We have

$$(v_i^\top (\theta - \hat{\theta}))^2 \leq \frac{2 + (4 + 2\sqrt{d/\ell})\lambda'_i + 2\sqrt{\lambda'_i d}}{\ell}. \quad (17)$$

Via a union bound, we know that with probability at least  $(1 - \delta)$ , (17) holds for every eigenvector  $v_i$ . When this event happens, for every vector  $x$  such that  $\|x\|_2 \leq 1$ , let us write  $x = \sum_{i=1}^d a_i v_i$ . We have  $\sum_{i=1}^d a_i^2 \leq 1$  and we have

$$\begin{aligned}
 |x^\top (\theta - \hat{\theta})| &= \left| \sum_{i=1}^d a_i v_i^\top (\theta - \hat{\theta}) \right| \leq d^{1/2} \left( \sum_{i=1}^d a_i^2 (v_i^\top (\theta - \hat{\theta}))^2 \right)^{1/2} \\
 &\leq \left( \frac{d}{\ell} \right)^{1/2} \left( \sum_{i=1}^d a_i^2 (2 + (4 + 2\sqrt{d/\ell})\lambda'_i + 2\sqrt{\lambda'_i d}) \right)^{1/2}, \quad (18)
 \end{aligned}$$

where the first inequality is due to Cauchy-Schwartz inequality. Since

$$\begin{aligned} \sum_{i=1}^d a_i^2 (2 + (4 + 2\sqrt{d/\ell})\lambda'_i + 2\sqrt{\lambda'_i d}) &\leq \sum_{i=1}^d a_i^2 (2 + (4 + 2\sqrt{d/\ell})\lambda'_i + \lambda'_i + d) \\ &= (2 + d) \sum_{i=1}^d a_i^2 + (5 + 2\sqrt{d/\ell}) \sum_{i=1}^d a_i^2 \lambda'_i \leq (2 + d) + (5 + 2\sqrt{d/\ell}) \|x\|_{M(\lambda^*)}^2, \end{aligned} \quad (19)$$

continuing with (18) we have

$$\left| x^T (\theta - \hat{\theta}) \right| \leq \sqrt{\frac{(2 + d)d + (5d + 2d\sqrt{d/\ell}) \|x\|_{M(\lambda^*)}^2}{\ell}}$$

holds for every  $x$  such that  $\|x\|_2 \leq 1$ .

## D. Proof of Lemma 17

Let  $\mathcal{E}_r$  denote the event that  $|x^T \hat{\theta}_r - x^T \theta| \leq \epsilon_r/2, \forall x \in S$ . By Theorem 12, we have  $\Pr[\mathcal{E}_r] \geq 1 - \delta_r$ . Let  $\mathcal{E}$  denote the event  $\bigwedge_{r=1}^{+\infty} \mathcal{E}_r$ . Via a union bound, we get  $\Pr[\mathcal{E}] \geq 1 - \sum_{r=1}^{+\infty} \delta_r = 1 - (6/\pi^2)\delta \cdot \sum_{r=1}^{+\infty} 1/r^2 \geq 1 - \delta$ . We condition the rest of the proof upon event  $\mathcal{E}$ .

(i) We show that  $S_{[1]} \in S_r$  (so the best arm is in the output set) by induction on  $r$ . The base case follows since  $S_{[1]} \in S = S_1$ . Moreover, if  $S_{[1]} \in S_k$  for some  $k \geq 1$ , we have that  $S_{[1]}^T \hat{\theta}_k + \epsilon_k \geq S_{[1]}^T \theta + \epsilon_k/2 \geq x_{a_k}^T \theta + \epsilon_k/2 \geq x_{a_k}^T \hat{\theta}$ , and so  $S_{[1]} \in S_{k+1}$ .

To show that ELIMITIL<sub>p</sub> outputs at most  $p$  arms, let  $t_i$  be the smallest index such that  $\Delta_i > \epsilon_{t_i-1}$  (so  $\Delta_i \in (\epsilon_{t_i-1}, \epsilon_{t_i-2}]$ ), with  $\epsilon_0$  defined to be 1. We prove that if  $i \neq 1$ , then  $S_{[i]} \notin S_{t_i+1}$ . Indeed since  $S_{[1]} \in S_{t_i}$ , if  $S_{[i]} \in S_{t_i}$  then  $S_{[i]}^T \hat{\theta}_{t_i} \leq S_{[i]}^T \theta + \epsilon_{t_i}/2 < S_{[1]}^T \theta - \epsilon_{t_i-1} + \epsilon_{t_i}/2 = (S_{[1]}^T \theta - \epsilon_{t_i}/2) - \epsilon_{t_i} \leq S_{[1]}^T \hat{\theta}_{t_i} - \epsilon_{t_i} \leq x_{a_{t_i}}^T \hat{\theta}_{t_i} - \epsilon_{t_i}$ , and so  $S_{[i]} \notin S_{t_i+1}$ .

Therefore  $\{S_{[1]}\} \subseteq S_{t_{p+1}+1} \subseteq \{S_{[1]}, \dots, S_{[p]}\}$  and hence the algorithm stops after  $t_{p+1}$  rounds. Thus, the first part of this lemma is proved.

(ii) Note that the sample complexity of line 5 is  $O\left(\frac{c_0 d}{\epsilon_r^2} \ln \frac{|S|}{\delta_r}\right)$ . Also, the algorithm stops after  $t_{p+1}$  rounds. Therefore, the total number of samples consumed is bounded by

$$\begin{aligned} O\left(\frac{c_0 d}{\epsilon_{t_{p+1}}^2} \ln \frac{|S|}{\delta_{t_{p+1}}}\right) &= O\left(\frac{c_0 d}{\epsilon_{t_{p+1}}^2} (\ln \delta^{-1} + \ln |S| + \ln(t_{p+1}))\right) \\ &= O\left(\frac{c_0 d}{\Delta_{p+1}^2} (\ln \delta^{-1} + \ln |S| + \ln \ln \Delta_{p+1}^{-1})\right), \end{aligned}$$

where the last equality follows from  $\epsilon_{t_{p+1}} = \Theta(\Delta_{p+1})$  and  $t_{p+1} = \Theta(\ln \Delta_{p+1}^{-1})$ . Therefore, the proof of this lemma is complete.

## E. Proof of Lemma 20

Let  $\epsilon_r = 1/2^r$ . Set  $Y = \{y = x - x' \mid x, x' \in S\}$ . Let  $\mathcal{E}_r^{(1)}$  be the event

$$|x^T \hat{\theta}_r - x^T \theta| \leq \epsilon_r/2, \forall x \in T, \quad (20)$$

and let  $\mathcal{E}_r^{(2)}$  be the event

$$|y^T \hat{\theta}_r - y^T \theta| \leq \text{Err}_{\lambda_r^*}(y, \ell_r, \theta) \leq \text{err}_{\lambda_r^*}(y, \ell_r), \forall y \in Y. \quad (21)$$

By Theorem 12 and a union bound, we have  $\Pr[\mathcal{E}_r^{(1)}] \geq 1 - \frac{\delta_r}{|S|}$ . By Lemma 7 and a union bound, we have  $\Pr[\mathcal{E}_r^{(2)}] \geq 1 - \frac{|S|-1}{|S|} \cdot \delta_r$ . Let  $\mathcal{E}_r = \mathcal{E}_r^{(1)} \wedge \mathcal{E}_r^{(2)}$  and  $\mathcal{E} = \bigwedge_{r=1}^{+\infty} \mathcal{E}_r$ . Hence via a union bound, we have  $\Pr[\mathcal{E}] \geq 1 - \sum_{r=1}^{+\infty} \delta_r = 1 - (6/\pi^2)\delta \cdot \sum_{r=1}^{+\infty} 1/r^2 \geq 1 - \delta$ .

We now condition on the event  $\mathcal{E}$  till the end of the proof. Therefore, for all  $x', x \in S$  and  $r \geq 1$ , we have

$$|(x' - x)^T \widehat{\theta}_r - (x' - x)^T \theta| \leq \min\{\text{err}_{\lambda_T^*}(x' - x, \ell_r), \widehat{\text{Err}}_{\lambda_T^*}(x' - x, \ell_r)\}.$$

(i) We prove that  $S_{[1]} \in S_r$  by induction on  $r$ . The base case follows since  $S_{[1]} \in S = S_1$ . Furthermore, if  $S_{[1]} \in S_k$ , we have  $(x_{a_k} - S_{[1]})^T \widehat{\theta}_k \leq (x_{a_k} - S_{[1]})^T \theta + \min\{\text{err}_{\lambda_T^*}(x_{a_k} - S_{[1]}, \ell_r), \widehat{\text{Err}}_{\lambda_T^*}(x_{a_k} - S_{[1]}, \ell_r)\} \leq \min\{\text{err}_{\lambda_T^*}(x_{a_k} - S_{[1]}, \ell_r), \widehat{\text{Err}}_{\lambda_T^*}(x_{a_k} - S_{[1]}, \ell_r)\}$ . Hence  $S_{[1]} \in S_{k+1}$ .

To show that  $\mathcal{Y}$ -ELIMTIL $_p$  outputs at most  $p$  arms, let  $t_i$  be the smallest index such that  $\Delta_i > \epsilon_{t_i-1}$  (so  $\Delta_i \in (\epsilon_{t_i-1}, \epsilon_{t_i-2}]$ ), with  $\epsilon_0$  defined to be 1. We prove that if  $i \neq 1$ , then  $S_{[i]} \notin S_{t_i+1}$ . Indeed since  $S_{[1]} \in S_{t_i}$ , if  $S_{[i]} \in S_{t_i}$  then  $(x_{a_{t_i}} - S_{[i]})^T \widehat{\theta}_{t_i} \geq (S_{[1]} - S_{[i]})^T \widehat{\theta}_{t_i} \geq (S_{[1]} - S_{[i]})^T \theta - \epsilon_r = \Delta_i - \epsilon_r > \epsilon_r \geq \text{err}_{\lambda_T^*}(x_{a_r} - S_{[i]}, \ell_r) \geq \min\{\text{err}_{\lambda_T^*}(x_{a_r} - S_{[i]}, \ell_r), \widehat{\text{Err}}_{\lambda_T^*}(x_{a_r} - S_{[i]}, \ell_r)\}$ , and so  $S_{[i]} \notin S_{t_i+1}$ .

Therefore,  $\{S_{[1]}\} \subseteq S_{t_{p+1}+1} \subseteq \{S_{[1]}, \dots, S_{[p]}\}$  and hence the algorithm stops after  $t_{p+1}$  rounds. Thus, the first part of this lemma is proved.

(ii) Note that  $c_1 \leq 2$ , the sample complexity of Line 5 is  $O\left(\frac{c_0 d}{\epsilon_r^2} \ln \frac{|S|}{\delta_r}\right)$ . Also, the algorithm stops after  $t_{p+1}$  rounds. Therefore, using the same proof, mutatis mutandis, as that of Lemma 17 (ii), total number of samples consumed is bounded by

$$O\left(\frac{c_0 d}{\Delta_{p+1}^2} (\ln \delta^{-1} + \ln |S| + \ln \ln \Delta_{p+1}^{-1})\right),$$

and the proof of this lemma is now complete.

## F. Proof of Theorem 22

Let  $\mathcal{E}_r, r \geq 0$  be the event that algorithm  $\mathcal{Y}$ -ELIMTIL $_{\lfloor d/2^r \rfloor}(S_r, \mathcal{X} \cap \text{span}(S_r), \delta_r)$  outputs a set of at most  $\lfloor d/2^r \rfloor$  arms with the best arm included, and the sample complexity is  $O\left(\frac{c_0 \cdot \lfloor d/2^r \rfloor}{\Delta_{\lfloor d/2^r \rfloor + 1}^2} (\ln \delta_r^{-1} + \ln |\mathcal{X}| + \ln \ln \Delta_{\lfloor d/2^r \rfloor + 1}^{-1})\right)$ . By Lemma 20, we have  $\Pr[\mathcal{E}_r] \geq 1 - \delta_r$ . Let  $\mathcal{E}$  be the event  $\bigwedge_{r=0}^{+\infty} \mathcal{E}_r$ . Via a union bound, we see that  $\Pr[\mathcal{E}] \geq 1 - \sum_{r=0}^{+\infty} \delta_r = 1 - 6/\pi^2 \cdot \delta \cdot \sum_{r=1}^{+\infty} 1/r^2 \geq 1 - \delta$ . The proof is conditioned upon event  $\mathcal{E}$  occurring.

(i) We first claim that the final output is the best arm. It suffices to prove that  $\mathcal{X}_{[1]} \in S_r$  for all  $r \geq 0$ . We prove this claim by induction on  $r$ . The base case follows since  $\mathcal{X}_{[1]} \in \mathcal{X} = S_0$ . If  $\mathcal{X}_{[1]} \in S_k$  holds, for some  $k \geq 0$ , since  $\mathcal{E}_k$  holds, we know that  $S_{k+1}$  contains the best arm of  $S_k$  which is  $\mathcal{X}_{[1]}$  by assumption. Therefore,  $\mathcal{X}_{[1]} \in S_{k+1}$ , and (i) is proved.

(ii) Let  $r_0 = \lfloor \log_2 d \rfloor$ . Since  $\mathcal{E}$  is true, the total sample complexity is bounded by

$$\begin{aligned} & \sum_{r=0}^{r_0} O\left(\frac{c_0 \cdot \lfloor d/2^r \rfloor}{\Delta_{\lfloor d/2^r \rfloor + 1}^2} (\ln \delta_r^{-1} + \ln |\mathcal{X}| + \ln \ln \Delta_{\lfloor d/2^r \rfloor + 1}^{-1})\right) \\ &= \sum_{r=0}^{r_0} O\left(\frac{c_0 \cdot (\lfloor d/2^r \rfloor - \lfloor d/2^{r+1} \rfloor)}{\Delta_{\lfloor d/2^r \rfloor + 1}^2} (\ln \delta_r^{-1} + \ln |\mathcal{X}| + \ln \ln \Delta_{\lfloor d/2^r \rfloor + 1}^{-1})\right) \\ &= \sum_{r=0}^{r_0-1} \sum_{i=\lfloor d/2^{r+1} \rfloor + 1}^{\lfloor d/2^r \rfloor} O\left(\frac{c_0}{\Delta_i^2} (\ln \delta^{-1} + \ln |\mathcal{X}| + \ln \ln \Delta_i^{-1})\right) \\ &= O\left(\sum_{i=2}^d \frac{c_0}{\Delta_i^2} (\ln \delta^{-1} + \ln |\mathcal{X}| + \ln \ln \Delta_i^{-1})\right). \end{aligned}$$

## G. Details for computing $\lambda_{\mathcal{X}}^*$ and $M(\lambda_{\mathcal{X}}^*)$

Given a distribution  $\lambda$  over  $\mathcal{X}$ ,  $M(\lambda)$  is computed by  $\sum_{i=1}^N \lambda_i x_i x_i^T$ . To compute  $\lambda_{\mathcal{X}}^*$ , we use entropic mirror descent introduced in (Beck & Teboulle, 2003). The details are included in Algorithm 5. For our experiments, we used  $\epsilon = 0.1$  and  $\eta_t = 0.001$ .

**Algorithm 5** The entropic mirror descent algorithm for computing  $\lambda_{\mathcal{X}}^*$ .

---

- 1: **Input:** Arms set  $\mathcal{X}$ , dimension  $d$ , Lipschitz constant  $L_f$  of function  $\log \det M(\lambda)$  and tolerance  $\epsilon$ .
  - 2: Initialize  $t \leftarrow 1$  and  $\lambda^{(1)} \leftarrow (1/N, \dots, 1/N)$ .
  - 3: **while**  $|\max_{x \in \mathcal{X}} x^T M(\lambda^{(t)})^{-1} x - d| \geq \epsilon$  **do**
  - 4:      $\eta_t \leftarrow \frac{\sqrt{2 \ln N}}{L_f} \frac{1}{\sqrt{t}}$ .
  - 5:     Compute gradient  $g_i^{(t)} \leftarrow \text{Tr}(M(\lambda^{(t)})^{-1} (x_i x_i^T))$ .
  - 6:     Update  $\lambda_i^{(t+1)} \leftarrow \frac{\lambda_i^{(t)} \exp(\eta_t g_i^{(t)})}{\sum_{i=1}^N \lambda_i^{(t)} \exp(\eta_t g_i^{(t)})}$ .
  - 7:      $t \leftarrow t + 1$ .
  - 8: **Output:**  $\lambda^{(t)}$ .
-
